# Supplementary material for: Activation of MDL-1 (CLEC5A) on immature myeloid cells triggers lethal shock in mice
Source: JCI journal article supplement (doi:10.1172/jci57682), 2011-10-17
Supplement: sd1 [file 1]

**A**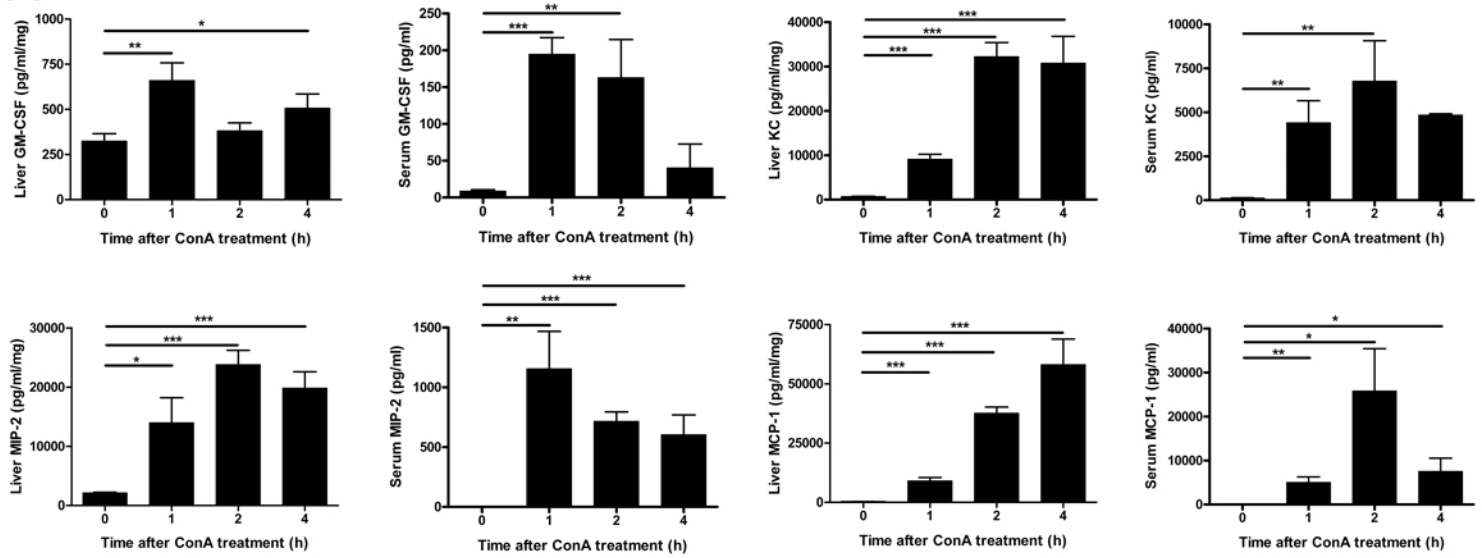**B**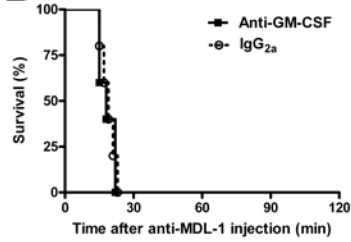**C**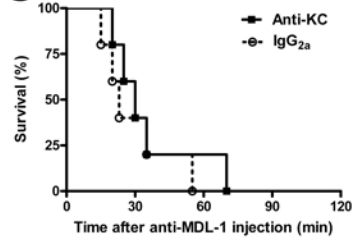**D**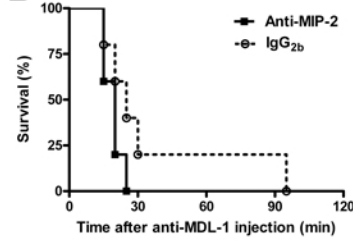**E**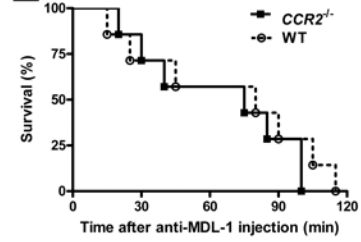

**Supplemental Figure 1. ConA increased GM-CSF, KC, MIP-2 and MCP-1 production but they are not involved in MDL-1-triggered shock.** (A) Liver homogenates and sera were obtained from mice treated with ConA for indicated times (n=5). GM-CSF, KC, MIP-2 and MCP-1 levels in liver homogenates and sera were quantitated by Luminex. \*P<0.05, \*\*P<0.01, \*\*\*P<0.001 compared to 0 h time point. (B-D) Mice were pretreated with anti-mouse neutralizing mAbs for (B) GM-CSF, (C) KC, (D) MIP-2 and corresponding isotype control (n=5) prior to administration of ConA followed by anti-MDL-1 mAb, and survival was monitored. (E) CCR2<sup>-/-</sup> and WT mice (n=5) were treated with ConA followed by anti-MDL-1 mAb, and survival was monitored.

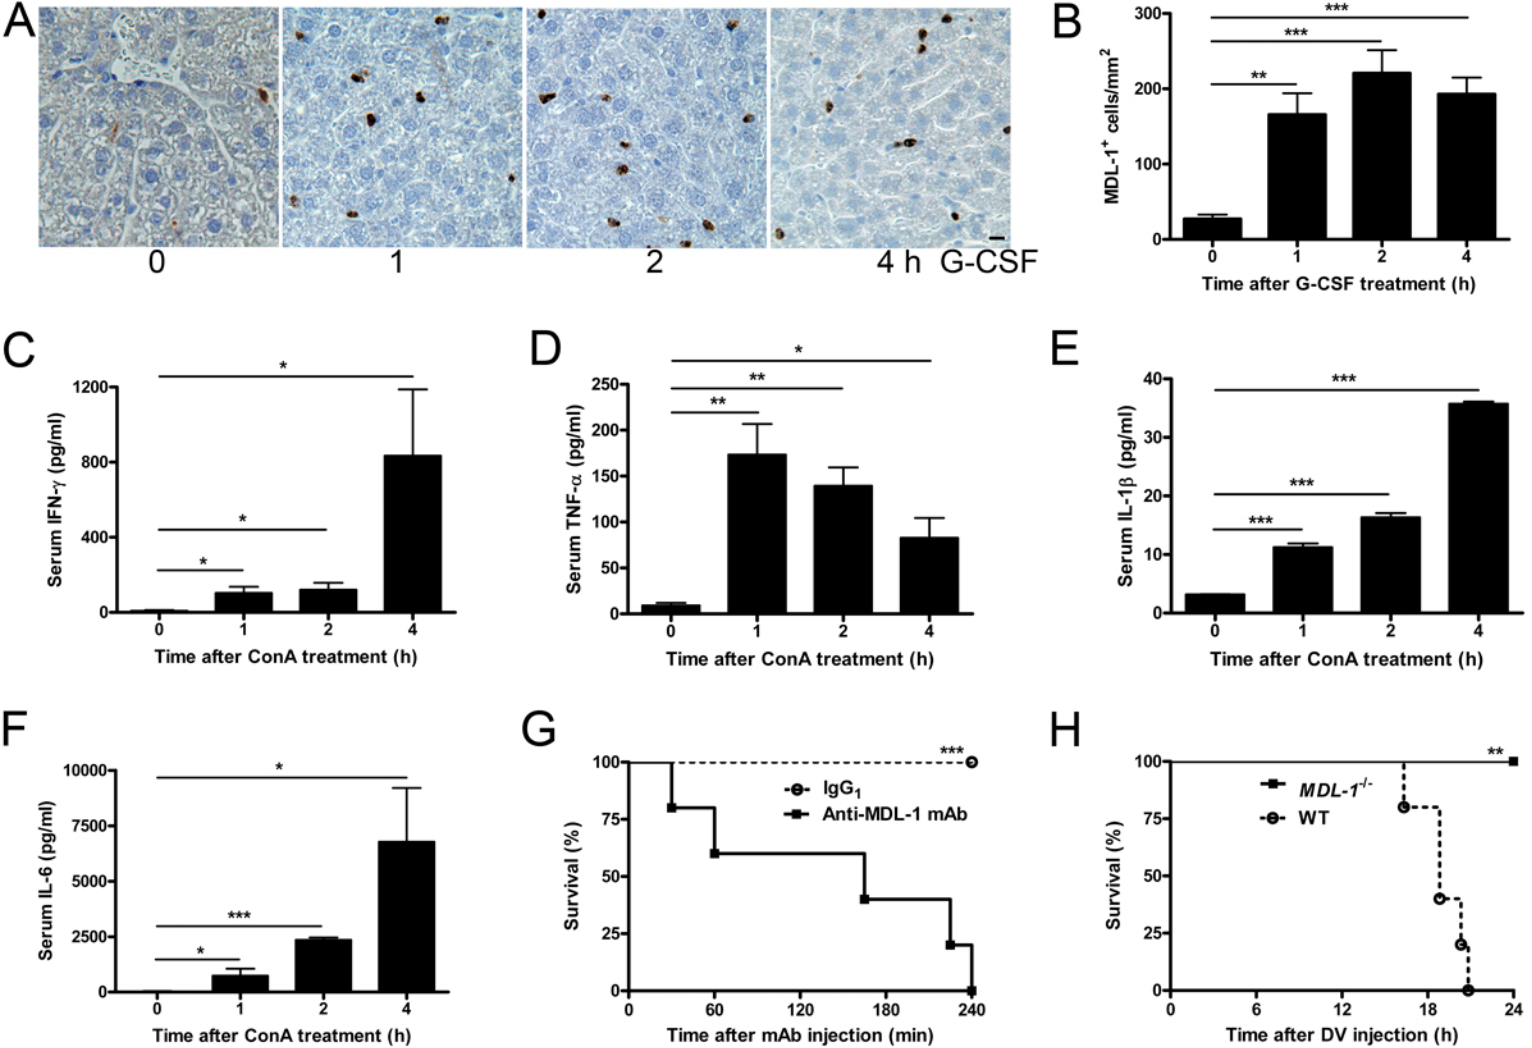

**Supplemental Figure 2. G-CSF mobilizes hepatic infiltration of MDL-1<sup>+</sup> cells, subsequent cytokine priming and MDL-1 activation cause lethal shock.** (A) Mice were treated with G-CSF for indicated times (n=5) and liver sections were stained with anti-MDL-1 mAb. Scale bar: 10  $\mu$ m. (B) Quantitation of MDL-1<sup>+</sup> cells in (A). \*\*P<0.01, \*\*\*P<0.001 compared to 0 h time point. (C-F) Sera were obtained from mice treated with ConA for indicated times (n=5). (C) IFN- $\gamma$ , (D) TNF- $\alpha$ , (E) IL-1 $\beta$ , and (F) IL-6 levels in the sera were quantitated by Luminex. \*P<0.05, \*\*P<0.01, \*\*\*P<0.001 compared to naive sera. (G) Mice were treated with G-CSF, IFN- $\gamma$ , TNF- $\alpha$ , IL-1 $\beta$ , IL-6, followed by anti-MDL-1 mAb (n=5) and survival was monitored. \*\*\*P<0.001 compared to IgG<sub>1</sub>. (H) MDL-1<sup>-/-</sup> and WT mice were treated with G-CSF, IFN- $\gamma$ , TNF- $\alpha$ , IL-1 $\beta$ , IL-6, followed by DV (n=5) and survival was monitored. \*\*P<0.01 compared to WT.

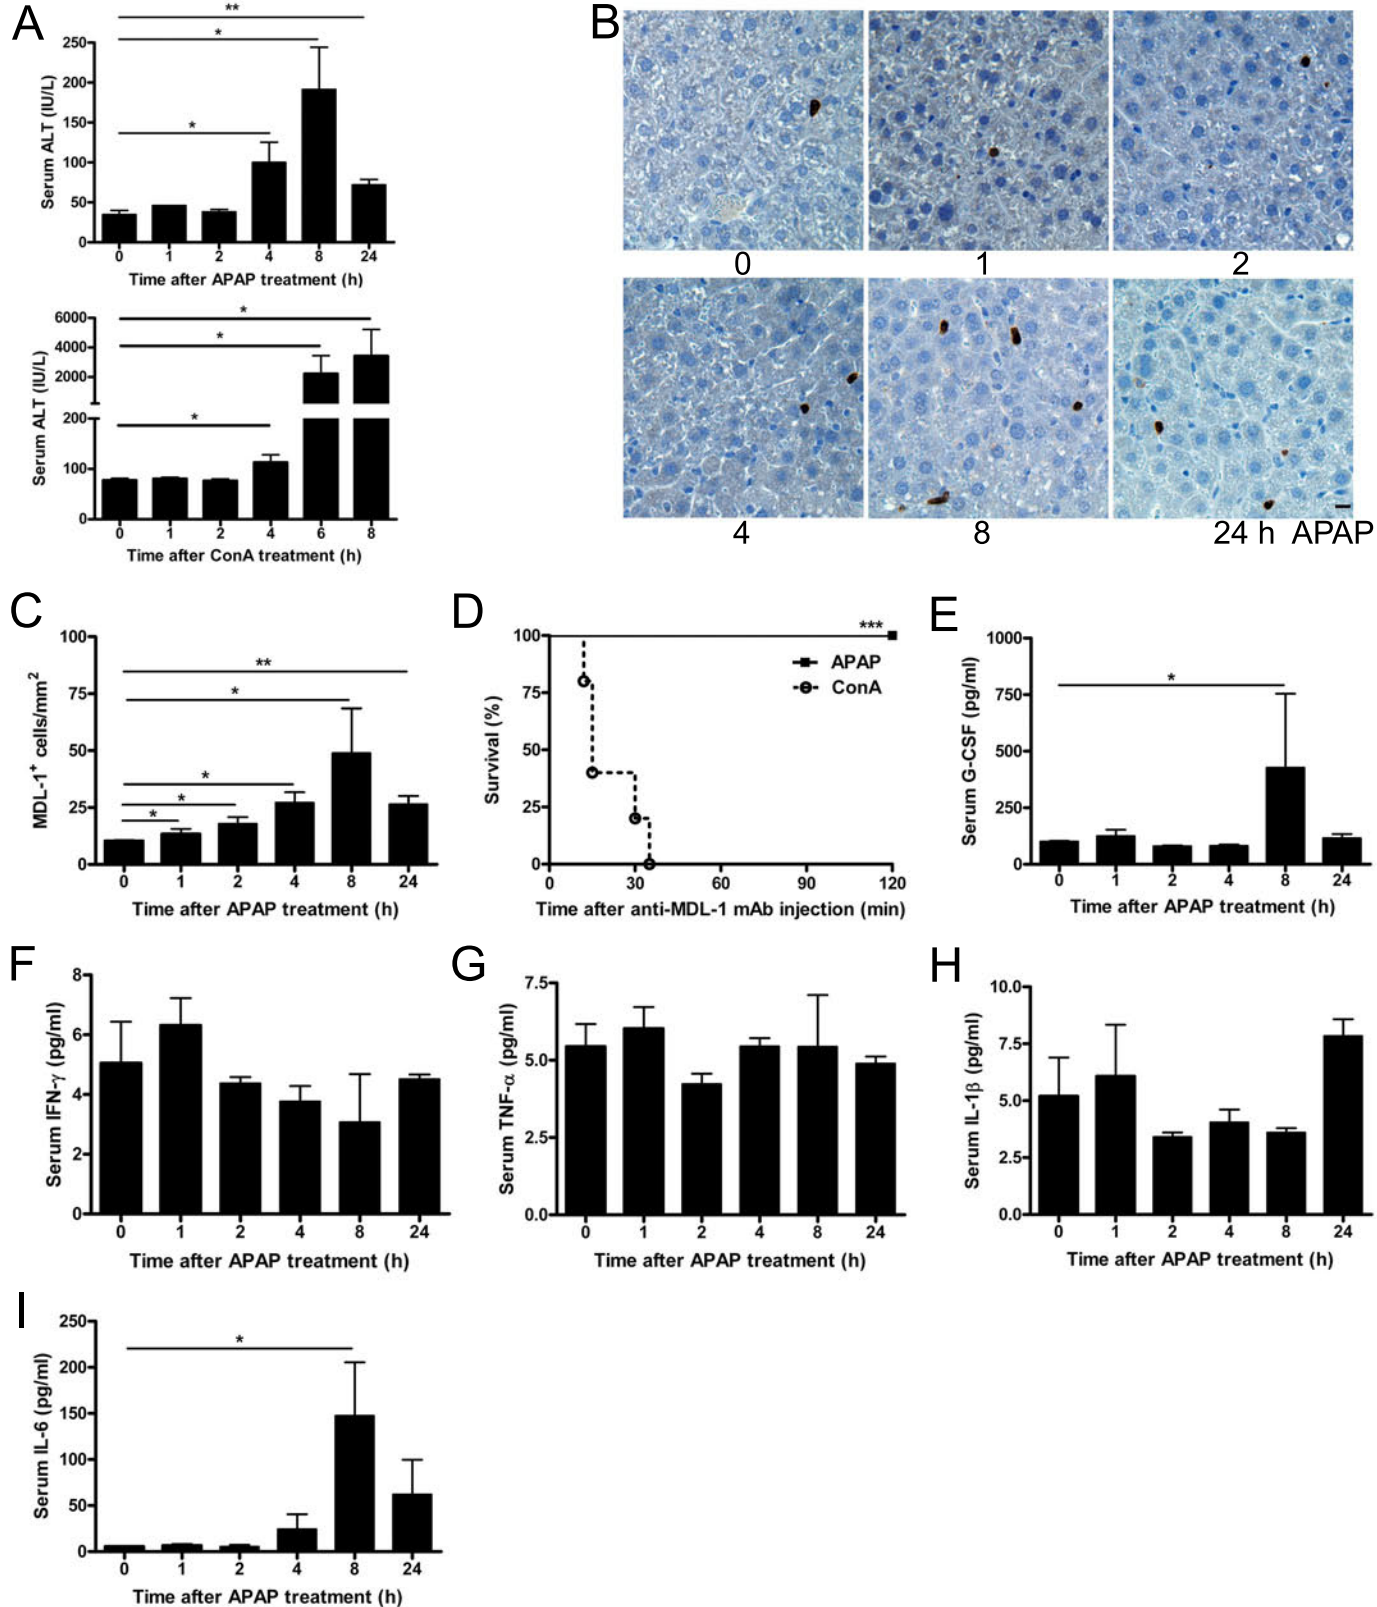

**Supplemental Figure 3. APAP-induced liver injury weakly recruits MDL-1<sup>+</sup> cells, and subsequent triggering of MDL-1 does not cause lethal shock.** (A) C57BL/6 mice were treated with APAP (top) or ConA (bottom) for indicated times (n=5), sera were collected and serum ALT levels measured. \*P<0.05, \*\*P<0.01 compared to 0 h time point. (B) Liver sections from (A) were stained with anti-MDL-1 mAb. Scale bar: 10 μm. (C) Quantitation of MDL-1<sup>+</sup> cells in (B). (D) Mice were treated with APAP for 8 h or ConA for 4 h followed by anti-MDL-1 mAb (n=5) and survival was monitored. \*\*\*P<0.001 compared to ConA treatment. (E-I) Serum taken from (A) was analyzed for (E) G-CSF, (F) IFN-γ, (G) TNF-α, (H) IL-1β, and (I) IL-6. \*P<0.05 compared to 0 h time point.



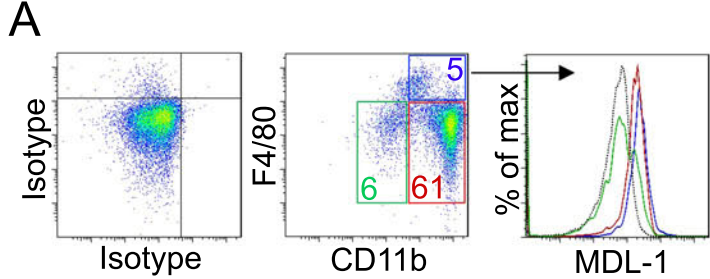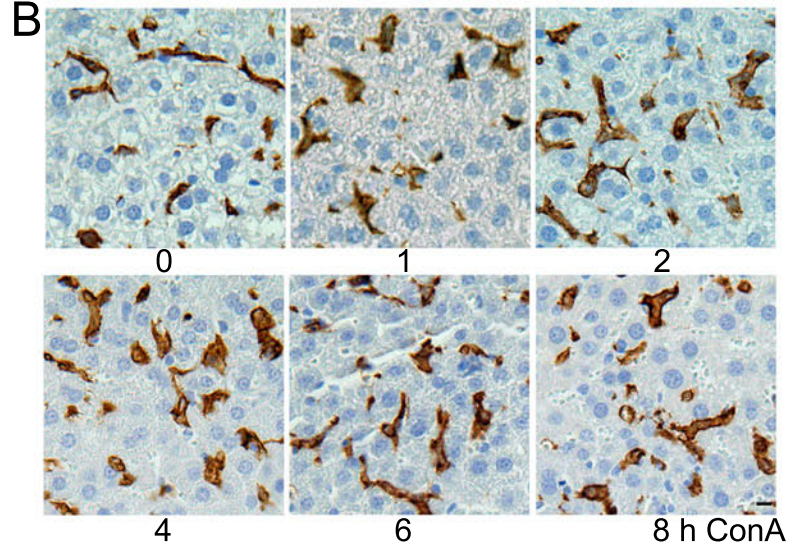

**Supplemental Figure 4. MDL-1 is not expressed on macrophages.** (A) Leukocytes isolated from livers of ConA-treated mice were purified using CD45 microbeads and analyzed by flow cytometry for expression of CD11b and F4/80 gated on CD45<sup>+</sup> cells. Background signal was established in the same population by staining with the matched isotype controls. Numbers indicate the percentage of CD11b<sup>+</sup>/F4/80<sup>+</sup> (blue box), CD11b<sup>+</sup>/F4/80<sup>-</sup> (red box), and CD11b<sup>-</sup>/F4/80<sup>-</sup> (green box) cell population. Individual population was analyzed for MDL-1 expression (dotted line=isotype control). (B) Mice were treated with ConA for indicated times (n=5) and liver sections were stained with anti-F4/80 mAb. Scale bar: 10  $\mu$ m.

MDL-1<sup>+</sup> gated

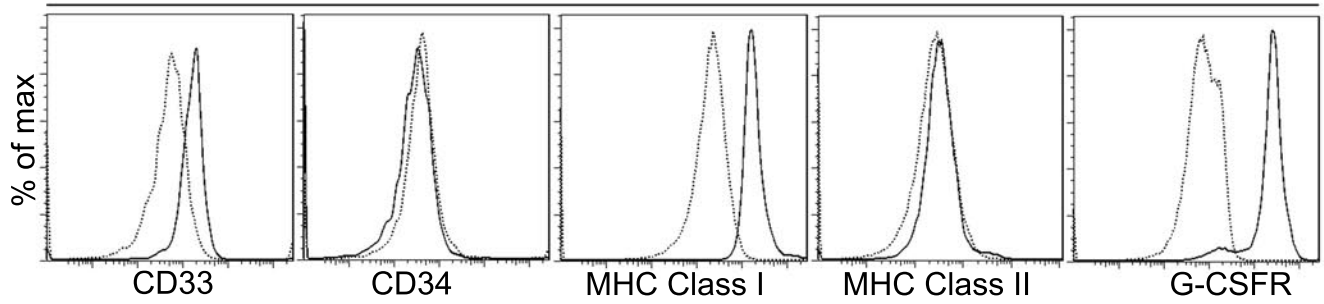

**Supplemental Figure 5. Immunophenotyping of MDL-1<sup>+</sup> cells as CD33<sup>+</sup>/CD34<sup>-</sup>/MHC Class I<sup>+</sup>/MHC Class II<sup>-</sup>/G-CSFR<sup>+</sup> immature myeloid cells.** Leukocytes isolated from livers of ConA-treated mice were purified using CD45 microbeads and analyzed by flow cytometry for expression of CD33, CD34, MHC Class I, MHC Class II and G-CSFR gated on MDL-1<sup>+</sup> cells (dotted line=isotype control).

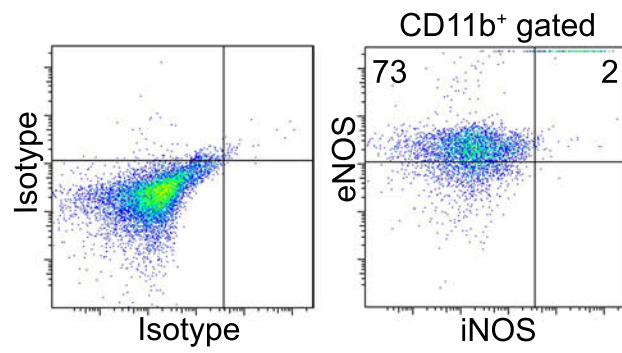

**Supplemental Figure 6. iNOS is not expressed in immature myeloid cells.** Leukocytes isolated from livers of ConA-treated mice were analyzed by flow cytometry for expression of eNOS and iNOS gated on CD11b<sup>+</sup> cells. Background signal was established in the same population by staining with the matched isotype controls (left panel).

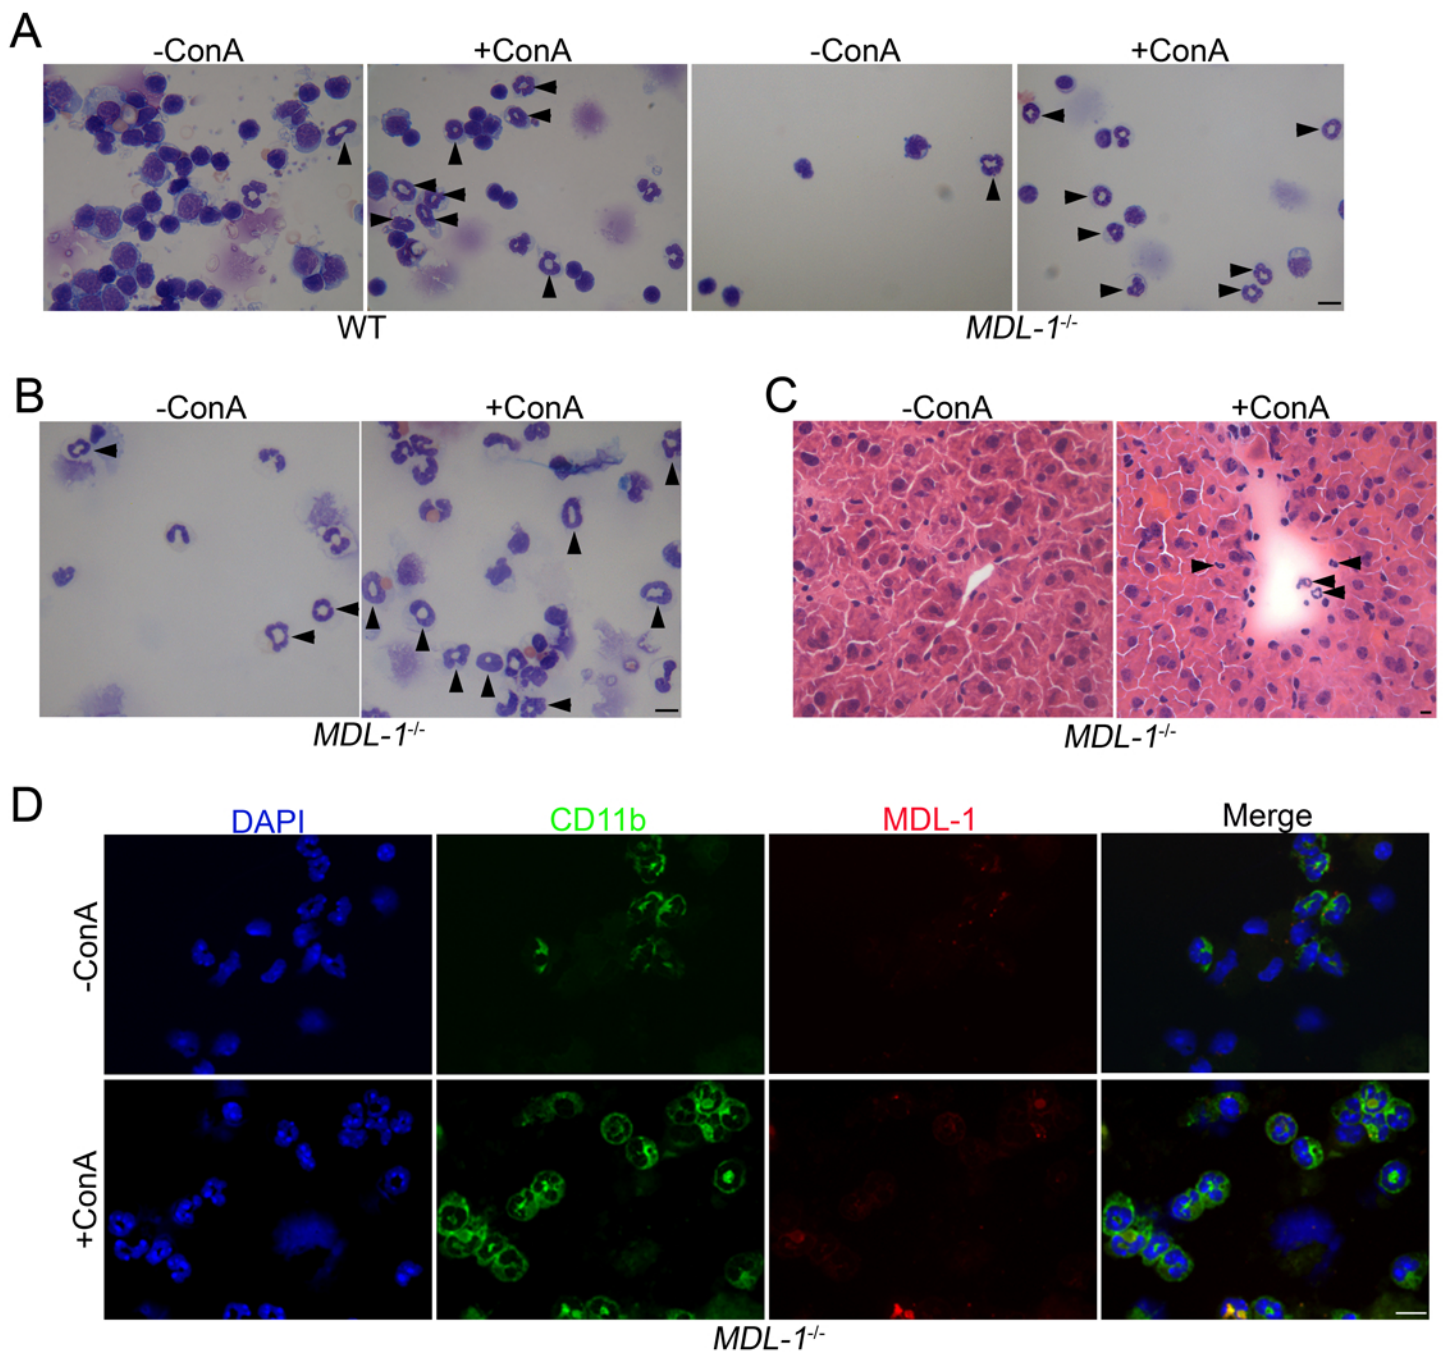

**Supplemental Figure 7. ConA-induced infiltration of myeloid cells to blood and liver is MDL-1-independent.** (A) Morphologic analysis of Diff-Quik stained cytopsin preparations of Gr-1<sup>+</sup> cells isolated from blood of naive and ConA-treated WT and *MDL-1<sup>-/-</sup>* mice. Note the increased number of cells with ring-shaped nuclei (as indicated by arrows) by ConA treatment in both WT and *MDL-1<sup>-/-</sup>* mice. Scale bar: 10  $\mu$ m. (B) Diff-Quik stained cytopsin preparations of Gr-1<sup>+</sup> cells isolated from livers of naive and ConA-treated *MDL-1<sup>-/-</sup>* mice. Ring cells are indicated by arrows. Scale bar: 10  $\mu$ m. (C) Representative micrographs of H&E-stained liver sections from naive and ConA-treated *MDL-1<sup>-/-</sup>* mice. Ring cells are indicated by arrows. Scale bar: 10  $\mu$ m. (D) Representative micrographs of immunostaining cytopsin preparations of Gr-1<sup>+</sup> cells isolated from livers of naive (top panel) and ConA-treated (bottom panel) *MDL-1<sup>-/-</sup>* mice. Cells were stained with antibodies against CD11b (green) and MDL-1 (red). Nuclei were counterstained with DAPI (blue). Scale bar: 10  $\mu$ m.

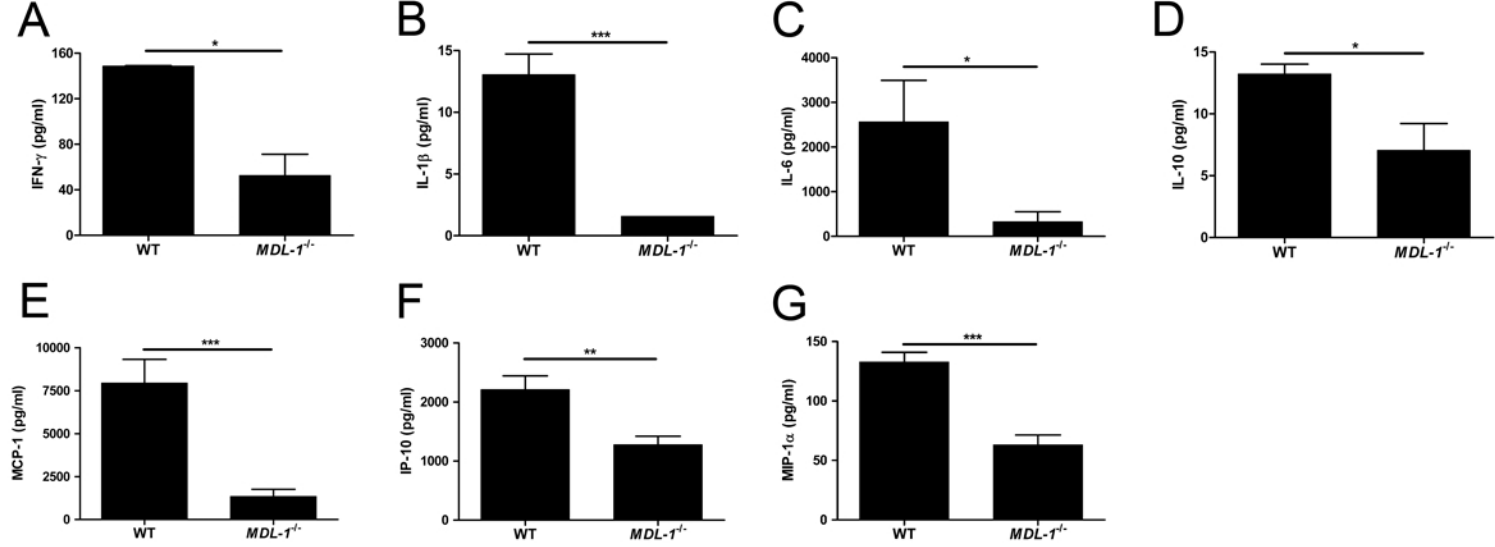

**Supplemental Figure 8. MDL-1-triggered shock is associated with elevated serum levels of IFN- $\gamma$ , IL-1 $\beta$ , IL-6, IL-10, MCP-1, IP-10 and MIP-1 $\alpha$ .** Serum was collected from WT and *MDL-1*<sup>-/-</sup> mice treated with ConA followed by anti-MDL-1 mAb (n=5). **(A)** IFN- $\gamma$ , **(B)** IL-1 $\beta$ , **(C)** IL-6, **(D)** IL-10, **(E)** MCP-1, **(F)** IP-10, and **(G)** MIP-1 $\alpha$  levels were quantitated by Luminex. \*P<0.05, \*\*P<0.01, \*\*\*P<0.001 compared to *MDL-1*<sup>-/-</sup>.
